# Supplementary material for: Behavioral and Physiological Reactions to a Sudden Novel Object in the Weanling Horse: Quantitative Phenotypes for Future GWAS
Source: MDPI journal article supplement (doi:10.3390/genes14030593), 2023-02-26
Supplement: s1 [file s1]

**Supplementary Table S1.** Age and sex measures for four foal crop years.

| <b>Foal Crop</b> | <b>Tested<br/>Mean Age</b> | <b>Minimum<br/>Age</b> | <b>Maximum Age</b> | <b>Number Females</b> | <b>Number Males</b> |
|------------------|----------------------------|------------------------|--------------------|-----------------------|---------------------|
| <b>2014</b>      | 255.0                      | 212                    | 299                | 10                    | 5                   |
| <b>2015</b>      | 244.0                      | 188                    | 287                | 11                    | 7                   |
| <b>2016</b>      | 253.0                      | 213                    | 287                | 9                     | 10                  |
| <b>2017</b>      | 265.0                      | 217                    | 315                | 11                    | 11                  |
